# Supplementary material for: Natural Competence Is a Major Mechanism for Horizontal DNA Transfer in the Oral Pathogen Porphyromonas gingivalis
Source: PubMed Central journal article supplement — mBio. 2012 Jan 31;3(1):e00231-11. doi: 10.1128/mBio.00231-11 (PMC3268665; doi:10.1128/mbio.00231-11), 2012-01-31
Supplement: mbo001121216st01.pdf [file mbo001121216st01.pdf]

Supplemental Table 1: PCR Primers

| Name            | Sequence 5'-3'                                   | Description                                                          |
|-----------------|--------------------------------------------------|----------------------------------------------------------------------|
| 1244 A          | TGTGGGTGCCTTATTCTTT                              | Primers for creation of the <i>PG1244</i> $\phi$ tetQ genomic marker |
| 1244 B          | CGTACGTTAAGGAGATAATTCGGCCATCTTTTCGTTCTATC        |                                                                      |
| 1244 C          | GGAGATAGAAGCATTAGAACTTAACAGGTCTCATTCAATGC        |                                                                      |
| 1244 D          | AGTGTATTTAGCCTCGGTA                              |                                                                      |
| 1244 Fwd        | GACCTTATTGCTGCTTATG                              |                                                                      |
| 1244 Rev        | GAGGGAACGATTTTATGAC                              |                                                                      |
| tetQ upper      | CGAATTATCTCCTTAACGTACG                           |                                                                      |
| tetQ lower      | AAGTTCTAATGCTTCTATCTCC                           |                                                                      |
| deltaTramob A   | GGGATCGGTTTATAGCTT                               | Primers for creation of the <i>traAQmob::ermF</i> mutant construct   |
| deltaTramob B   | CTCTCACTCTGAATGGATAAAGTTTGCAGGGATTTCTTTGTGGAGT   |                                                                      |
| deltaTramob C   | AAGTCGGGTGGTTGTCAAGATGATTTTTCACCTTATAATCTTCCATCC |                                                                      |
| deltaTramob D   | CTTTTCACCACTCTACATC                              |                                                                      |
| deltaTramob Fwd | TGATGGAGGTGGATTTGT                               |                                                                      |
| deltaTramob Rev | AGCGAAGAGGTAGATAAG                               |                                                                      |
| ermF Fusion Fwd | TGCAAACCTTTATCCATTCAGAGTGAGAG                    |                                                                      |
| ermF Fusion Rev | AAAAATCATCTTGACAACCACCCGACTT                     |                                                                      |
| delta comF A    | GGATCGTATGAAGACAGGAA                             | Primers for creation of the <i>comF::ermF</i> mutant construct       |
| delta comF B    | GCAATAGCGGAAGCTATCGGAGGACAATAGCGAGGGAA           |                                                                      |
| delta comF C    | GCATAACGGCTGGCAAATTGCTTATGCTCTTTCCCTCTCC         |                                                                      |
| delta comF D    | TCAAACCTCGTCAAGAACC                              |                                                                      |
| delta comF Fwd  | CGGTAAATCCTTCTGTGCT                              |                                                                      |
| delta comF Rev  | TTACATGGATGGGCGACT                               |                                                                      |
| ermF upper      | CCGATAGCTTCCGCTATTGC                             |                                                                      |
| ermF lower      | CAATTTGCCAGCCGTTATGC                             |                                                                      |
