# Supplementary figures and images for: Natural Competence Is a Major Mechanism for Horizontal DNA Transfer in the Oral Pathogen Porphyromonas gingivalis
Source: PubMed Central journal article supplement — mBio. 2012 Jan 31;3(1):e00231-11. doi: 10.1128/mBio.00231-11 (PMC3268665; doi:10.1128/mbio.00231-11), 2012-01-31

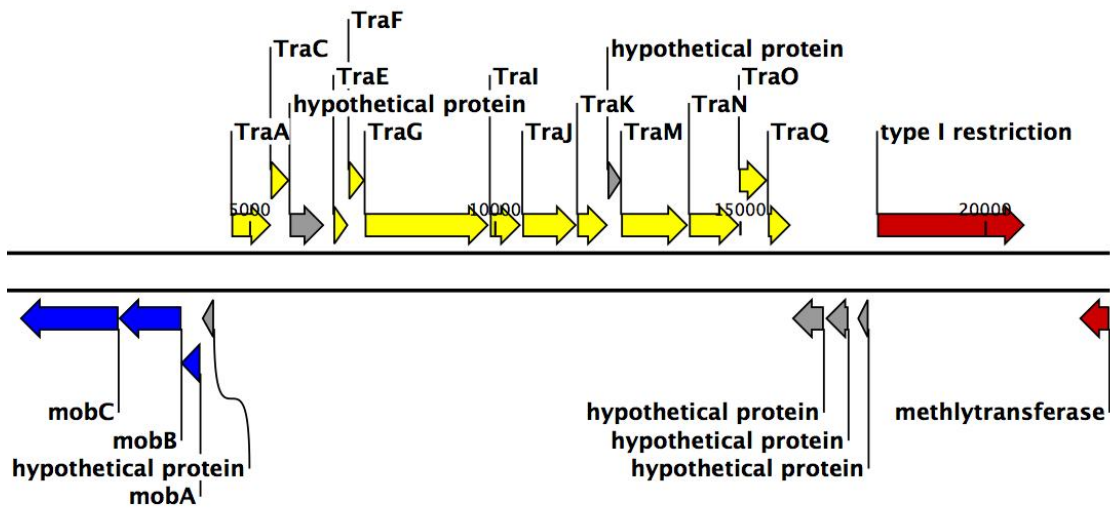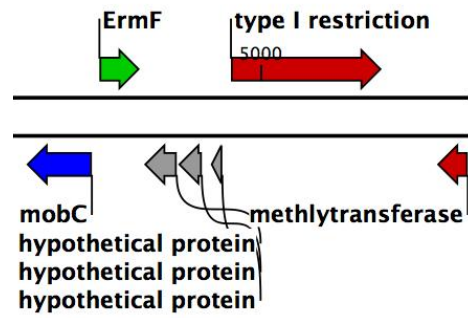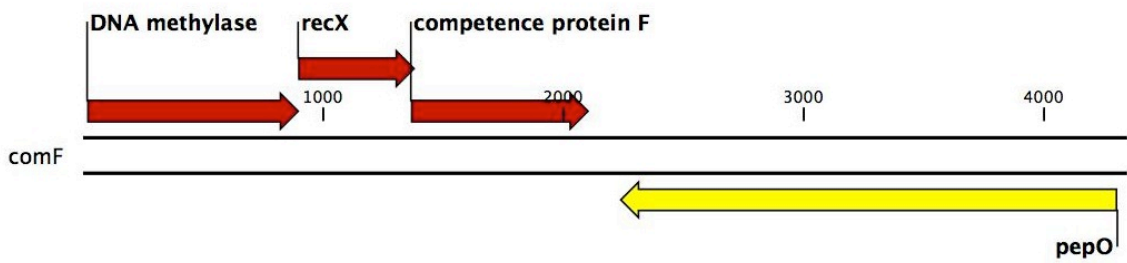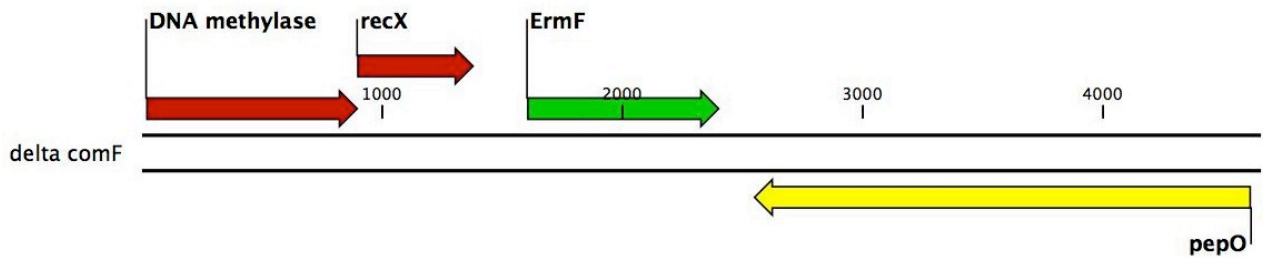

Supplement: mbo001121216sf01.pdf [file mbo001121216sf01.pdf]

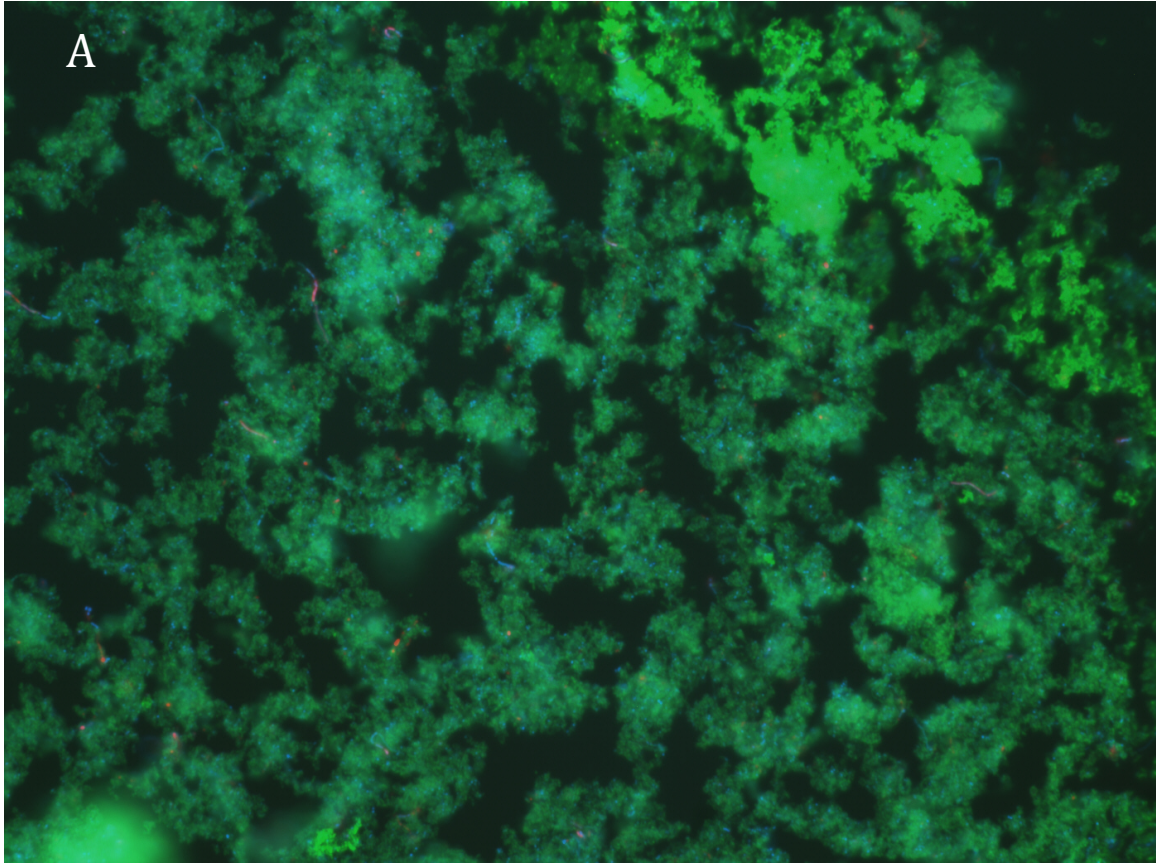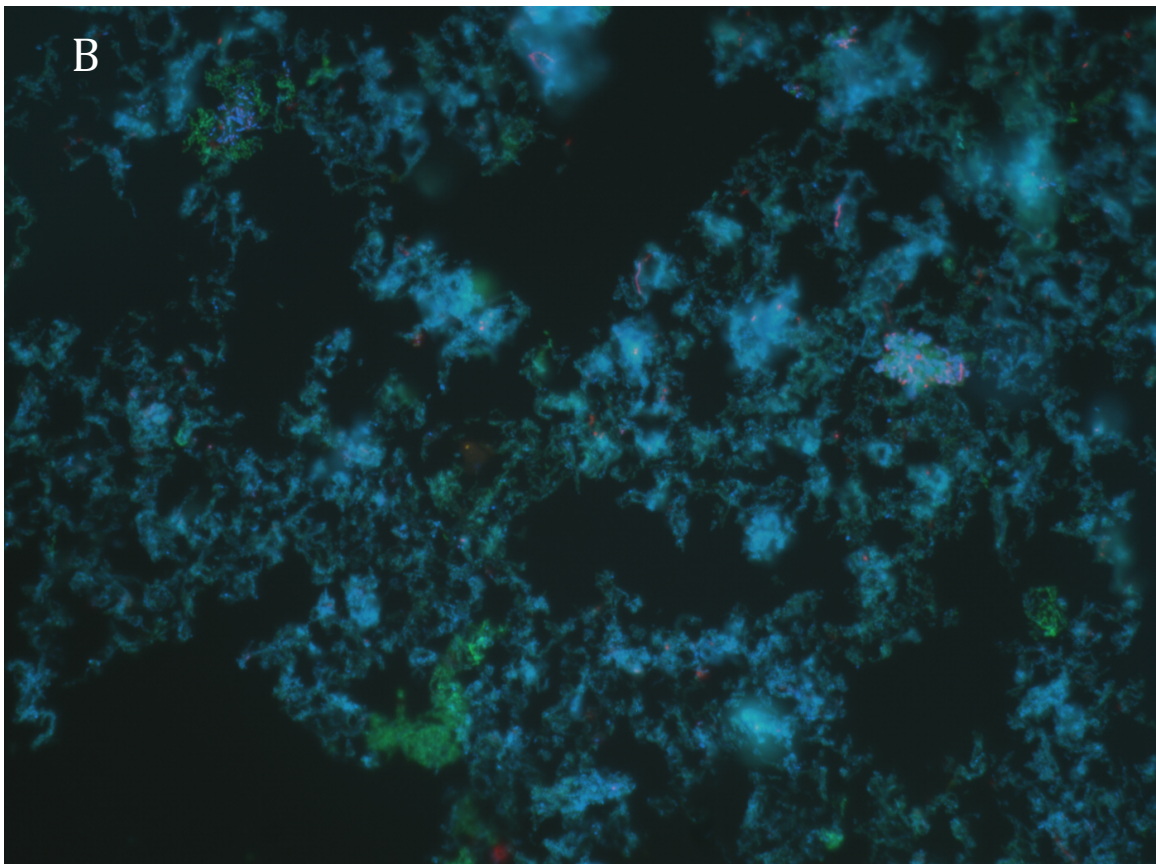

Supplement: mbo001121216sf02.pdf [file mbo001121216sf02.pdf]
